# Supplementary material for: Ethane C–H bond activation on the Fe(iv)–oxo species in a Zn-based cluster of metal–organic frameworks: a density functional theory study
Source: Royal Society of Chemistry journal article supplement (doi:10.1039/c6cp07771d), 2017-01-01

## Supplementary Information

### Ethane C–H Bond Activation on the Fe(IV)-Oxo Species in a Zn-Based Cluster of Metal-Organic Framework: A Density Functional Theory Study

Sarawoot Impeng,<sup>a</sup> Siwarut Siwaipram,<sup>a</sup> Sareeya Bureekaew,<sup>a,\*</sup> and Michael Probst<sup>b</sup>

<sup>a</sup> Department of Chemical and Biomolecular Engineering, School of Energy Science and Engineering, Vidyasirimedhi Institute of Science and Technology, Rayong 21210, Thailand

<sup>b</sup> Institute of Ion Physics and Applied Physics, University of Innsbruck, 6020 Innsbruck, Austria

\*E-mail: sareeya.b@vistec.ac.th

**Table S1** Relative energies  $\Delta E$ ,  $\Delta E_{\text{zero}}$  and  $\Delta H$  at 298.15 K and 1 atm for the decomposition of  $\text{N}_2\text{O}$  over  $\text{Fe-Zn}_3\text{O}(\text{pyrazole})_6$  cluster as calculated at the B3LYP-D3/def2-TZVP level of theory.

#### Quintet spin state

| Reaction coordinate | Relative energy (kcal mol <sup>-1</sup> ) |                              |                              |
|---------------------|-------------------------------------------|------------------------------|------------------------------|
|                     | $\Delta E$                                | $\Delta E_{\text{zero}}$     | $\Delta H_{298}$             |
| Adsorption          | -3.4                                      | -2.1                         | -2.3                         |
| Transition state    | 17.8 ( $E_{\text{a}}=21.2$ )              | 17.6 ( $E_{\text{a}}=19.7$ ) | 17.6 ( $E_{\text{a}}=19.9$ ) |
| Product             | -33.4                                     | -32.3                        | -31.9                        |
| Desorption          | -31.4                                     | -30.7                        | -30.9                        |

#### Triplet spin state

| Reaction coordinate | Relative energy (kcal mol <sup>-1</sup> ) |                                |                                |
|---------------------|-------------------------------------------|--------------------------------|--------------------------------|
|                     | $\Delta E$                                | $\Delta E_{\text{zero}}$       | $\Delta H_{298}$               |
| Adsorption          | 19.3 ( $E_{\text{ads}}=-3.5$ )            | 21.0 ( $E_{\text{ads}}=-2.1$ ) | 21.2 ( $E_{\text{ads}}=-1.8$ ) |
| Transition state    | 31.7 ( $E_{\text{a}}=12.4$ )              | 32.2 ( $E_{\text{a}}=11.2$ )   | 31.9 ( $E_{\text{a}}=10.7$ )   |
| Product             | -18.0                                     | -16.6                          | -17.0                          |
| Desorption          | -13.5                                     | -12.6                          | -16.3                          |

The quintet spin state is the most stable one throughout the reaction.  $E_{\text{ads}}$  and  $E_{\text{a}}$  refer to the adsorption energy and activation energy, respectively.

**Table S2** Relative energies  $\Delta E$ ,  $\Delta E_{\text{zero}}$  and  $\Delta H$  at 298.15 K and 1 atm for the ethane C–H bond activation over FeO-Zn<sub>3</sub>O(pyrazole)<sub>6</sub> cluster as calculated at B3LYP-D3/def2-TZVP level of theory.

| Reaction coordinate                             | Relative energy (kcal mol <sup>-1</sup> ) |                             |                             |
|-------------------------------------------------|-------------------------------------------|-----------------------------|-----------------------------|
|                                                 | $\Delta E$                                | $\Delta E_{\text{zero}}$    | $\Delta H_{298}$            |
| ADS <sup>5</sup>                                | 0.0                                       | 0.0                         | 0.0                         |
| TS <sub><math>\sigma</math></sub> <sup>5</sup>  | E <sub>a</sub> =22.5                      | E <sub>a</sub> =17.4        | E <sub>a</sub> =17.7        |
| TS <sub><math>\pi</math></sub> <sup>5</sup>     | E <sub>a</sub> =26.9                      | E <sub>a</sub> =22.4        | E <sub>a</sub> =22.5        |
| INT <sub><math>\sigma</math></sub> <sup>5</sup> | 15.4                                      | 13.0                        | 13.3                        |
| INT <sub><math>\pi</math></sub> <sup>5</sup>    | 17.3                                      | 14.7                        | 15.2                        |
| ADS <sup>3</sup>                                | 17.7                                      | 18.1                        | 18.5                        |
| TS <sub><math>\pi</math></sub> <sup>3</sup>     | 42.6 (E <sub>a</sub> =24.9)               | 38.2 (E <sub>a</sub> =20.1) | 38.1 (E <sub>a</sub> =19.6) |
| TS <sub><math>\delta</math></sub> <sup>3</sup>  | 30.3 (E <sub>a</sub> =12.6)               | 25.9 (E <sub>a</sub> =7.8)  | 26.0 (E <sub>a</sub> =7.5)  |
| INT <sub><math>\pi</math></sub> <sup>3</sup>    | 29.0                                      | 26.9                        | 27.6                        |
| INT <sub><math>\delta</math></sub> <sup>3</sup> | 17.6                                      | 15.0                        | 15.5                        |

**Table S3** Electronic energies of  $\text{Zn}_4\text{O}(\text{benzoate})_6$ ,  $\text{Fe-Zn}_3\text{O}(\text{benzoate})_6$ ,  $\text{FeO-Zn}_3\text{O}(\text{benzoate})_6$ ,  $\text{Fe-Zn}_3\text{O}(\text{pyrazole})_6$  and  $\text{FeO-Zn}_3\text{O}(\text{pyrazole})_6$  relative to the species with the lowest energy (B3LYP-D3/def2-TZVP calculations).

| <b>System</b>                                | <b>Spin multiplicity</b> | <b>*Relative energy (kcal mol<sup>-1</sup>)</b> |
|----------------------------------------------|--------------------------|-------------------------------------------------|
| $\text{Zn}_4\text{O}(\text{benzoate})_6$     | Singlet                  | 0.0                                             |
|                                              | Triplet                  | 79.4                                            |
|                                              | Quintet                  | 158.9                                           |
|                                              | Septet                   | 238.5                                           |
|                                              | Nonet                    | 318.2                                           |
| $\text{Fe-Zn}_3\text{O}(\text{benzoate})_6$  | Singlet                  | 47.1                                            |
|                                              | Triplet                  | 26.3                                            |
|                                              | Quintet                  | 0.0                                             |
|                                              | Septet                   | 56.0                                            |
|                                              | Nonet                    | 140.2                                           |
| $\text{FeO-Zn}_3\text{O}(\text{benzoate})_6$ | Singlet                  | 22.9                                            |
|                                              | Triplet                  | 4.7                                             |
|                                              | Quintet                  | 0.0                                             |
|                                              | Septet                   | 6.4                                             |
|                                              | Nonet                    | 85.7                                            |
| $\text{Fe-Zn}_3\text{O}(\text{pyrazole})_6$  | Singlet                  | 38.7                                            |
|                                              | Triplet                  | 22.8                                            |
|                                              | Quintet                  | 0.0                                             |
|                                              | Septet                   | 94.8                                            |
|                                              | Nonet                    | 184.8                                           |
| $\text{FeO-Zn}_3\text{O}(\text{pyrazole})_6$ | Singlet                  | 44.8                                            |
|                                              | Triplet                  | 18.0                                            |
|                                              | Quintet                  | 0.0                                             |
|                                              | Septet                   | 26.3                                            |
|                                              | Nonet                    | 120.9                                           |

\*Relative energy compared to the most stable spin state in each cluster system

**Table S4** Optimized geometric parameters of  $\text{Zn}_4\text{O}(\text{benzoate})_6$  in the singlet ground state compared with experimental data from X-ray diffraction and data from a previous calculation.

| Parameter                | Calculation |                    | Experiment         |
|--------------------------|-------------|--------------------|--------------------|
|                          | This work   | Ref. <sup>26</sup> | Ref. <sup>23</sup> |
| Bond distance (Å)        |             |                    |                    |
| Zn–O <sub>μ</sub>        | 1.98        | 1.98               | 1.93               |
| Zn–O1                    | 1.97        | 1.98               | 1.91               |
| Zn–Zn                    | 3.23        | -                  | 3.16               |
| C1–O1                    | 1.26        | 1.28               | 1.30               |
| C1–C2                    | 1.49        | 1.50               | 1.46               |
| Bond angle (°)           |             |                    |                    |
| Zn–O1–C1                 | 131.8       | 130.7              | 130.3              |
| O1–C–O1                  | 125.4       | 126.1              | 125.0              |
| O1–C1–C2                 | 117.3       | 117.0              | 117.5              |
| C1–C2–C3                 | 120.2       | 120.2              | 120.4              |
| Dihedral angle (°)       |             |                    |                    |
| O <sub>μ</sub> –Zn–O1–C1 | 0.6         | 0.0                | 0.0                |
| O1–C1–C2–C3              | 178.2       | 180.0              | 180.0              |

**Table S5** Energy barriers from  $\Delta E$  for the C–H bond activation of ethane over the  $\text{FeO-Zn}_3\text{O}(\text{pyrazole})_6$  cluster, as calculated at the DFT-D3/def2-TZVP//B3LYP-D3/def2-TZVP level of theory.

| Pathway    | Energy barrier (kcal mol <sup>-1</sup> ) |      |
|------------|------------------------------------------|------|
|            | PBE                                      | M06  |
| $\sigma^5$ | 24.8                                     | 19.2 |
| $\pi^5$    | 27.1                                     | 32.8 |
| $\pi^3$    | 25.2                                     | 30.0 |
| $\delta^3$ | 24.9                                     | 9.4  |

**Table S6** Comparison of selected geometrical parameters in the optimized geometries of  $\text{Zn}_4\text{O}(\text{benzoate})_6$  in the singlet ground state and of  $\text{Fe-Zn}_3\text{O}(\text{benzoate})_6$  in the quintet ground state. B3LYP-D3/def2-TZVP calculations; M is Zn for  $\text{Zn}_4\text{O}(\text{benzoate})_6$  and Fe for  $\text{Fe-Zn}_3\text{O}(\text{benzoate})_6$ .

| Parameter               | System                                   |                                             |
|-------------------------|------------------------------------------|---------------------------------------------|
|                         | $\text{Zn}_4\text{O}(\text{benzoate})_6$ | $\text{Fe-Zn}_3\text{O}(\text{benzoate})_6$ |
| Bond distance (Å)       |                                          |                                             |
| M-O <sub>μ</sub>        | 1.98                                     | 2.03                                        |
| M-O1                    | 1.97                                     | 2.00                                        |
| M-Zn                    | 3.23                                     | 3.25                                        |
| C1-O1                   | 1.26                                     | 1.26                                        |
| C1-C2                   | 1.49                                     | 1.49                                        |
| Bond angle (°)          |                                          |                                             |
| M-O1-C1                 | 131.8                                    | 132.2                                       |
| O1-C1-O1                | 125.4                                    | 125.1                                       |
| O1-C1-C2                | 117.3                                    | 117.7                                       |
| C1-C2-C3                | 120.2                                    | 120.2                                       |
| Dihedral angle (°)      |                                          |                                             |
| O <sub>μ</sub> -M-O1-C1 | 0.6                                      | 2.2                                         |
| O1-C1-C2-C3             | 178.2                                    | 179.8                                       |

**Table S7** Geometrical parameters along the pathway of the N<sub>2</sub>O decomposition over Fe-Zn<sub>3</sub>O(pyrazole)<sub>6</sub> in the quintet ground state. Bond distances are given in Å and bond angles in degrees (°).

| Parameter         | N <sub>2</sub> O/Fe-Zn <sub>3</sub> O(pyrazole) <sub>6</sub> system |            |                  |         |            |
|-------------------|---------------------------------------------------------------------|------------|------------------|---------|------------|
|                   | Isolated state                                                      | Adsorption | Transition state | Product | Desorption |
| Fe-N              | 2.06                                                                | 2.06       | 2.09             | 2.04    | 2.04       |
| Fe-N'             | 2.07                                                                | 2.07       | 2.07             | 2.04    | 2.04       |
| Fe-N''            | 2.07                                                                | 2.08       | 2.08             | 2.04    | 2.04       |
| Fe-O <sub>μ</sub> | 2.00                                                                | 2.01       | 2.00             | 1.97    | 1.97       |
| O-N1              | 1.18                                                                | 1.19       | 1.34             | -       | -          |
| N1-N2             | 1.12                                                                | 1.12       | 1.14             | 1.09    | -          |
| Fe-O              | -                                                                   | 3.17       | 1.98             | 1.63    | 1.63       |
| ∠N-N-O            | 180.0                                                               | 179.8      | 138.4            | -       | -          |

**Table S8** Key geometrical parameters along the pathway of the ethane C–H bond activation over FeO-Zn<sub>3</sub>O(pyrazole)<sub>6</sub>. Bond distances are given in Å and bond angles in degrees (°). Superscripts 3 and 5 refer to the triplet and quintet spin states, respectively, and subscripts  $\sigma$ ,  $\pi$  and  $\delta$  indicate the respective pathways.

| <b>C<sub>2</sub>H<sub>6</sub>/FeO-Zn<sub>3</sub>O(pyrazole)<sub>6</sub> system</b> |                          |                  |                                             |                                                |                                                |                                             |                                              |                                                 |                                                 |                                              |
|------------------------------------------------------------------------------------|--------------------------|------------------|---------------------------------------------|------------------------------------------------|------------------------------------------------|---------------------------------------------|----------------------------------------------|-------------------------------------------------|-------------------------------------------------|----------------------------------------------|
| Parameter                                                                          | Adsorption complex (ADS) |                  | Transition state (TS)                       |                                                |                                                |                                             | Intermediate (INT)                           |                                                 |                                                 |                                              |
|                                                                                    | ADS <sup>3</sup>         | ADS <sup>5</sup> | TS <sub><math>\pi</math></sub> <sup>3</sup> | TS <sub><math>\delta</math></sub> <sup>3</sup> | TS <sub><math>\sigma</math></sub> <sup>5</sup> | TS <sub><math>\pi</math></sub> <sup>5</sup> | INT <sub><math>\pi</math></sub> <sup>3</sup> | INT <sub><math>\delta</math></sub> <sup>3</sup> | INT <sub><math>\sigma</math></sub> <sup>5</sup> | INT <sub><math>\pi</math></sub> <sup>5</sup> |
| Fe–O                                                                               | 1.61                     | 1.63             | 1.75                                        | 1.80                                           | 1.78                                           | 1.76                                        | 1.82                                         | 1.82                                            | 1.82                                            | 1.82                                         |
| O–H                                                                                | 2.48                     | 2.57             | 1.18                                        | 1.24                                           | 1.22                                           | 1.24                                        | 0.97                                         | 0.97                                            | 0.97                                            | 0.97                                         |
| C–H                                                                                | 1.09                     | 1.09             | 1.35                                        | 1.30                                           | 1.29                                           | 1.37                                        | 2.73                                         | 2.46                                            | 2.39                                            | 2.68                                         |
| Fe–N                                                                               | 1.92                     | 2.04             | 1.96                                        | 2.03                                           | 2.05                                           | 2.03                                        | 1.95                                         | 2.02                                            | 2.02                                            | 2.02                                         |
| Fe–N'                                                                              | 2.00                     | 2.04             | 2.01                                        | 2.05                                           | 2.10                                           | 2.05                                        | 1.98                                         | 2.05                                            | 2.05                                            | 2.01                                         |
| Fe–N''                                                                             | 2.00                     | 2.04             | 1.97                                        | 2.05                                           | 2.10                                           | 2.05                                        | 2.01                                         | 2.05                                            | 2.05                                            | 2.05                                         |
| Fe–O <sub><math>\mu</math></sub>                                                   | 1.94                     | 1.97             | 1.93                                        | 1.96                                           | 2.03                                           | 1.96                                        | 1.94                                         | 1.95                                            | 1.95                                            | 1.94                                         |
| $\angle$ Fe–O–H                                                                    | 139.4                    | 161.5            | 116.9                                       | 109.4                                          | 139.5                                          | 112.4                                       | 110.5                                        | 107.8                                           | 107.2                                           | 107.0                                        |
| $\angle$ N'–Fe–N''                                                                 | 168.2                    | 120.5            | 169.2                                       | 133.5                                          | 129.1                                          | 132.6                                       | 166.1                                        | 130.3                                           | 130.9                                           | 132.9                                        |

**Table S9**  $\langle S^2 \rangle$  values for the N<sub>2</sub>O decomposition over Fe-Zn<sub>3</sub>O(pyrazole)<sub>6</sub>.

| System           | Triplet | Quintet |
|------------------|---------|---------|
| Isolated state   | 2.474   | 6.010   |
| Adsorption       | 2.452   | 6.009   |
| Transition state | 2.504   | 6.639   |
| Product          | 2.042   | 6.051   |
| Desorption       | 2.023   | 6.051   |

The  $\langle S^2 \rangle$  value for a pure triplet spin state is 2.0. From the Table S6, it can be seen that the  $\langle S^2 \rangle$  values of isolated state, adsorption state and transition state are larger than 2.0 on triplet potential energy surface. An analysis of the natural orbitals and the occupation number shows that an artificial mixing with the quintet ground state occurs, as is indicated by the fractional occupations of d-orbitals of the Fe center. The stationary points on the triplet surface are stabilized by such ‘spin contamination’ and their energies are less reliable. Even though it is artificially stabilized, the energy surface of the triplet spin state is higher than the quintet energy surface throughout the reaction pathway as shown in Fig. S1. Theoretically, the quintet surface is the thermodynamically favorable pathway for the N<sub>2</sub>O decomposition over Fe-Zn<sub>3</sub>O(pyrazole)<sub>6</sub> cluster.

**Table S10**  $\langle S^2 \rangle$  values for the ethane C–H bond activation over FeO-Zn<sub>3</sub>O(pyrazole)<sub>6</sub> cluster.

| System | Triplet                                 | Quintet                                 |
|--------|-----------------------------------------|-----------------------------------------|
| ADS    | 2.023                                   | 6.051                                   |
| TS     | 2.313 ( $\pi^3$ )/ 3.063 ( $\delta^3$ ) | 6.671 ( $\sigma^5$ )/ 6.045 ( $\pi^5$ ) |
| INT    | 2.388 ( $\pi^3$ )/ 3.045 ( $\delta^3$ ) | 6.044 ( $\sigma^5$ )/ 6.044 ( $\pi^5$ ) |



**Fig. S1** Energy profile for the  $N_2O$  dissociation over  $Fe-Zn_3O(pyrazole)_6$  in the triplet and quintet spin states. The inserted numbers are the relative energies  $\Delta E$  in  $kcal\ mol^{-1}$ .

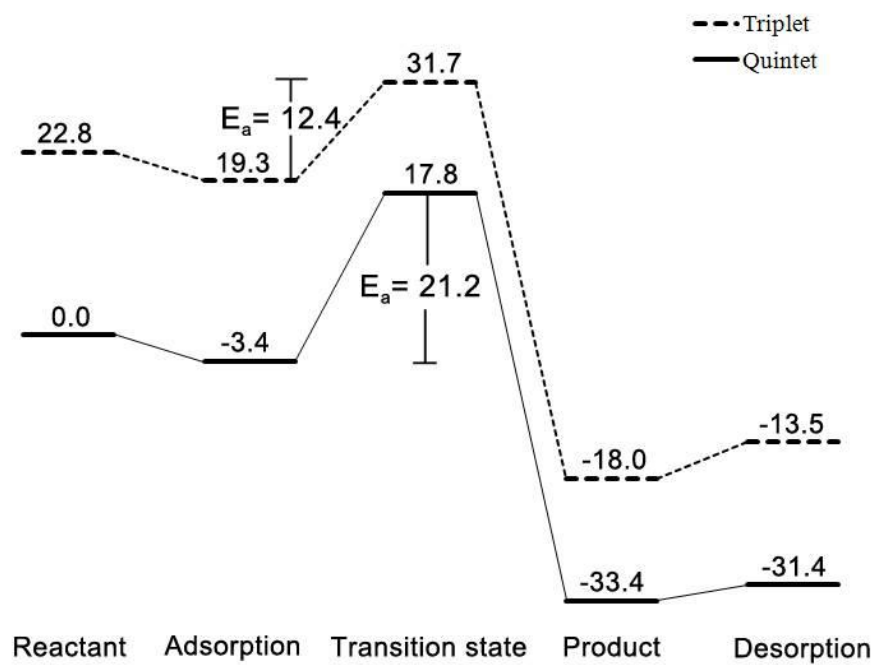

**Fig. S2** Optimized geometries of the adsorption complex (ADS) and of the intermediate (INT) for ethane C–H bond activation over FeO-Zn<sub>3</sub>O(pyrazole)<sub>6</sub> cluster. Superscript 3 and 5 refer to the triplet and quintet spin states, respectively. Subscript  $\sigma$ ,  $\pi$  and  $\delta$  represent the  $\sigma$ ,  $\pi$  and  $\delta$  mechanistic pathways, respectively.

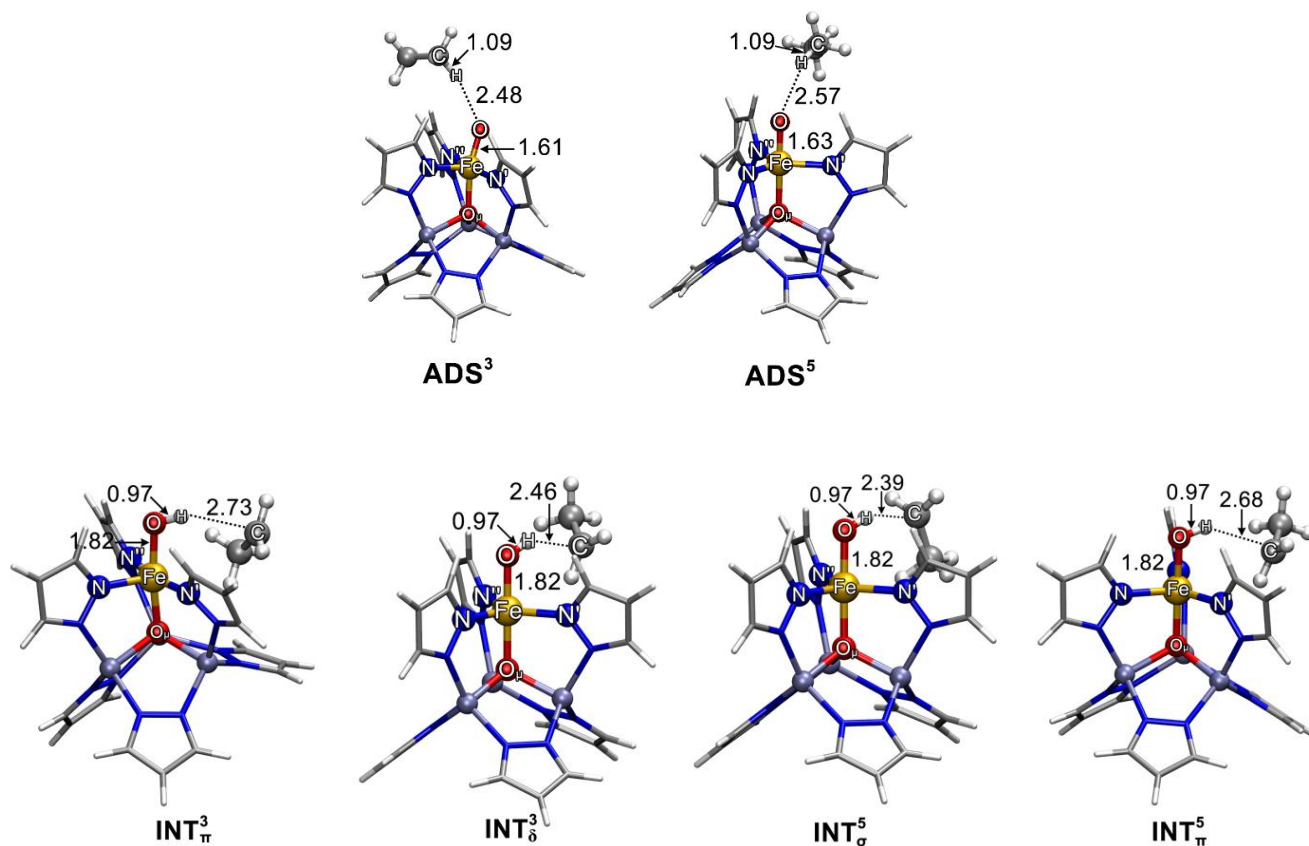

Supplement: c6cp07771d1.pdf [file c6cp07771d1.pdf]
